# Supplementary material
Source: publisher figshare collection journal article supplement (https://acs.figshare.com/ndownloader/files/5117467)
Supplement: Supplementary file 1 [file 5117467]

data_SRH466_HARTWIG_-_PAWLAS
#------------------------------------------------------------------------------
_audit_creation_date                  'Mon Dec 12 11:00:05 2000'
_audit_creation_method                'from TEXRAY.INF file'
_audit_update_record                   ?
#------------------------------------------------------------------------------
_computing_data_collection            'MSC/AFC Diffractometer Control'
_computing_cell_refinement            'MSC/AFC Diffractometer Control'
_computing_data_reduction             'teXsan'
_computing_structure_solution          ?
_computing_structure_refinement       'teXsan'
_computing_publication_material       'teXsan'
#------------------------------------------------------------------------------
_cell_length_a                         10.3141(3)
_cell_length_b                         13.1178(4)
_cell_length_c                         17.064(1)
_cell_angle_alpha                      93.178(2)
_cell_angle_beta                       94.933(2)
_cell_angle_gamma                      95.508(2)
_cell_volume                           2284.8(1)
_cell_formula_units_Z                  2
_cell_measurement_temperature          183.2
_cell_measurement_reflns_used          0
_cell_measurement_theta_min            0.0
_cell_measurement_theta_max            0.0
#------------------------------------------------------------------------------
_symmetry_cell_setting                 triclinic
_symmetry_space_group_name_H-M        'P -1       '
_symmetry_Int_Tables_number            2
_symmetry_space_group_name_Hall        ?
loop_
_symmetry_equiv_pos_as_xyz
   '   +x,   +y,   +z'
   '   -x,   -y,   -z'
#------------------------------------------------------------------------------
_exptl_crystal_description            'plate'
_exptl_crystal_colour                 'colorless'
_exptl_crystal_size_max                0.130
_exptl_crystal_size_mid                0.100
_exptl_crystal_size_min                0.060
_exptl_crystal_density_diffrn          1.191
_exptl_crystal_density_meas            ?
_chemical_formula_weight               819.12
_chemical_formula_analytical           ?
_chemical_formula_sum                  'C57 H60 N3 O2 '
_chemical_formula_moiety               '?'
_chemical_formula_structural           ?
_chemical_compound_source              ?
_exptl_crystal_F_000                   878.00
_exptl_absorpt_coefficient_mu          0.071
_exptl_absorpt_correction_type         none
#------------------------------------------------------------------------------
_diffrn_special_details                none
_diffrn_ambient_temperature            183.2
_diffrn_radiation_wavelength           0.7107
_diffrn_radiation_type                 MoKalpha
_diffrn_radiation_source              'X-ray tube'
_diffrn_radiation_monochromator        graphite
_diffrn_radiation_detector             ?
_diffrn_measurement_device            'unknown'
_diffrn_measurement_method            'omega scans with profile analysis'

_diffrn_standards_number              0
_diffrn_standards_interval_count      0
_diffrn_standards_decay_%             0.00
loop_
_diffrn_standard_refln_index_h     ?
_diffrn_standard_refln_index_k     ?
_diffrn_standard_refln_index_l      ?
_diffrn_reflns_number                  8093
_reflns_number_total                   8093
_reflns_number_observed                4712
_reflns_observed_criterion             5.00
_diffrn_reflns_av_R_equivalents        0.00
_diffrn_reflns_av_sigmaI/netI          ?
_diffrn_reflns_limit_h_min             0
_diffrn_reflns_limit_h_max             12
_diffrn_reflns_limit_k_min             -15
_diffrn_reflns_limit_k_max             15
_diffrn_reflns_limit_l_min             -20
_diffrn_reflns_limit_l_max             20
_diffrn_reflns_theta_min               ?
_diffrn_reflns_theta_max               25.10
_diffrn_reflns_reduction_process       ?

_diffrn_orient_matrix_UB_11            0.00000
_diffrn_orient_matrix_UB_12            0.00000
_diffrn_orient_matrix_UB_13            0.00000
_diffrn_orient_matrix_UB_21            0.00000
_diffrn_orient_matrix_UB_22            0.00000
_diffrn_orient_matrix_UB_23            0.00000
_diffrn_orient_matrix_UB_31            0.00000
_diffrn_orient_matrix_UB_32            0.00000
_diffrn_orient_matrix_UB_33            0.00000
#------------------------------------------------------------------------------
loop_
_atom_type_symbol
_atom_type_oxidation_number
_atom_type_number_in_cell
_atom_type_scat_dispersion_real
_atom_type_scat_dispersion_imag
_atom_type_scat_source
   C  0   114 0.003 0.002     'International Tables'
   H  0   120 0.000 0.000     'International Tables'
   N  0     6 0.006 0.003     'International Tables'
   O  0     4 0.011 0.006     'International Tables'
#------------------------------------------------------------------------------
loop_
_atom_site_label
_atom_site_fract_x
_atom_site_fract_y
_atom_site_fract_z
_atom_site_U_iso_or_equiv
_atom_site_thermal_displace_type
_atom_site_calc_flag
_atom_site_calc_attached_atom
  O(1)   -0.4283(2)  -0.4206(2)  0.1581(1)   0.0405(7)   Uij ? ?
  O(2)   -0.1484(2)  0.4469(2)   0.3260(2)   0.0587(9)   Uij ? ?
  N(1)   0.0191(2)   -0.2105(2)  0.0584(2)   0.0370(8)   Uij ? ?
  N(2)   0.1877(2)   0.1804(2)   0.2083(2)   0.0421(9)   Uij ? ?
  N(3)   0.5902(2)   0.1920(2)   0.0804(1)   0.0328(8)   Uij ? ?
  C(1)   0.1419(3)   0.0816(2)   0.1726(2)   0.0323(9)   Uij ? ?
  C(2)   0.0176(3)   0.0610(2)   0.1339(2)   0.0369(10)  Uij ? ?
  C(3)   -0.0229(3)  -0.0353(2)  0.0971(2)   0.0368(10)  Uij ? ?
  C(4)   0.0590(3)   -0.1126(2)  0.0993(2)   0.0326(9)   Uij ? ?
  C(5)   0.1809(3)   -0.0938(2)  0.1419(2)   0.0325(9)   Uij ? ?
  C(6)   0.2225(3)   0.0022(2)   0.1781(2)   0.0344(9)   Uij ? ?
  C(7)   -0.0973(3)  -0.2657(2)  0.0819(2)   0.0318(9)   Uij ? ?
  C(8)   -0.0975(3)  -0.3039(2)  0.1560(2)   0.0371(10)  Uij ? ?
  C(9)   -0.2093(3)  -0.3557(2)  0.1789(2)   0.0360(10)  Uij ? ?
  C(10)  -0.3229(3)  -0.3682(2)  0.1289(2)   0.0325(9)   Uij ? ?
  C(11)  -0.3246(3)  -0.3305(2)  0.0544(2)   0.0351(10)  Uij ? ?
  C(12)  -0.2106(3)  -0.2795(2)  0.0315(2)   0.0339(9)   Uij ? ?
  C(13)  -0.5513(3)  -0.4324(2)  0.1107(2)   0.041(1)    Uij ? ?
  C(14)  -0.6469(3)  -0.4977(3)  0.1530(2)   0.047(1)    Uij ? ?
  C(15)  -0.6683(3)  -0.4570(3)  0.2347(2)   0.054(1)    Uij ? ?
  C(16)  -0.7348(4)  -0.3614(3)  0.2357(3)   0.070(1)    Uij ? ?
  C(17)  -0.7599(4)  -0.3176(3)  0.3179(3)   0.082(2)    Uij ? ?
  C(18)  -0.8550(5)  -0.3814(4)  0.3601(3)   0.093(2)    Uij ? ?
  C(19)  0.0975(3)   0.2455(2)   0.2386(2)   0.0339(9)   Uij ? ?
  C(20)  0.0510(3)   0.2302(2)   0.3103(2)   0.042(1)    Uij ? ?
  C(21)  -0.0318(3)  0.2955(3)   0.3415(2)   0.046(1)    Uij ? ?
  C(22)  -0.0687(3)  0.3773(3)   0.3000(2)   0.041(1)    Uij ? ?
  C(23)  -0.0242(3)  0.3914(3)   0.2272(2)   0.046(1)    Uij ? ?
  C(24)  0.0586(3)   0.3260(3)   0.1968(2)   0.041(1)    Uij ? ?
  C(25)  -0.1793(4)  0.4460(4)   0.4047(3)   0.088(2)    Uij ? ?
  C(26a) -0.289(1)   0.520(1)    0.4181(8)   0.113(4)    Uij ? ?
  C(26b) -0.247(2)   0.557(2)    0.409(1)    0.112(6)    Uij ? ?
  C(27a) -0.286(1)   0.567(1)    0.4890(9)   0.175(5)    Uij ? ?
  C(27b) -0.205(2)   0.613(2)    0.432(1)    0.124(8)    Uij ? ?
  C(28b) -0.371(2)   0.687(1)    0.422(1)    0.157(6)    Uij ? ?
  C(28a) -0.416(1)   0.637(1)    0.5009(8)   0.121(5)    Uij ? ?
  C(29a) -0.347(2)   0.719(1)    0.498(1)    0.154(6)    Uij ? ?
  C(29b) -0.416(2)   0.704(1)    0.4901(9)   0.113(5)    Uij ? ?
  C(30)  -0.4927(5)  0.7883(4)   0.5092(3)   0.102(2)    Uij ? ?
  C(31)  0.3217(3)   0.2176(2)   0.2083(2)   0.0331(9)   Uij ? ?
  C(32)  0.3844(3)   0.2803(2)   0.2715(2)   0.0379(10)  Uij ? ?
  C(33)  0.5152(3)   0.3137(2)   0.2703(2)   0.039(1)    Uij ? ?
  C(34)  0.5868(3)   0.2854(2)   0.2091(2)   0.0346(9)   Uij ? ?
  C(35)  0.5233(3)   0.2244(2)   0.1452(2)   0.0301(9)   Uij ? ?
  C(36)  0.3907(3)   0.1921(2)   0.1450(2)   0.0304(9)   Uij ? ?
  C(37)  0.6965(3)   0.2533(2)   0.0534(2)   0.0297(9)   Uij ? ?
  C(38)  0.7080(3)   0.3602(2)   0.0633(2)   0.0334(9)   Uij ? ?
  C(39)  0.8126(3)   0.4154(2)   0.0342(2)   0.0346(9)   Uij ? ?
  C(40)  0.9036(3)   0.3684(2)   -0.0058(2)  0.0347(9)   Uij ? ?
  C(41)  0.8919(3)   0.2617(2)   -0.0172(2)  0.0308(9)   Uij ? ?
  C(42)  0.7899(3)   0.2053(2)   0.0154(2)   0.0310(9)   Uij ? ?
  C(43)  0.5455(3)   0.0948(2)   0.0393(2)   0.0284(9)   Uij ? ?
  C(44)  0.5344(3)   0.0066(2)   0.0801(2)   0.0312(9)   Uij ? ?
  C(45)  0.4896(3)   -0.0874(2)  0.0415(2)   0.0324(9)   Uij ? ?
  C(46)  0.9389(4)   0.0761(4)   0.6512(2)   0.067(1)    Uij ? ?
  C(47)  0.8229(4)   0.0301(3)   0.6143(3)   0.071(2)    Uij ? ?
  C(48)  0.7906(5)   0.0427(4)   0.5360(3)   0.083(2)    Uij ? ?
  C(49)  0.8757(5)   0.1009(4)   0.4940(3)   0.083(2)    Uij ? ?
  C(50)  0.9906(5)   0.1464(4)   0.5311(3)   0.079(2)    Uij ? ?
  C(51)  1.0227(4)   0.1344(3)   0.6099(3)   0.070(1)    Uij ? ?
  C(52)  0.2831(4)   0.0925(3)   0.7585(2)   0.060(1)    Uij ? ?
  C(53)  0.2539(4)   -0.0089(3)  0.7349(2)   0.059(1)    Uij ? ?
  C(54)  0.3408(4)   -0.0602(3)  0.6956(2)   0.057(1)    Uij ? ?
  C(55)  0.4572(4)   -0.0087(3)  0.6788(2)   0.062(1)    Uij ? ?
  C(56)  0.4854(4)   0.0935(3)   0.7024(2)   0.064(1)    Uij ? ?
  C(57)  0.3980(4)   0.1443(3)   0.7418(2)   0.058(1)    Uij ? ?
  H(1)   -0.0403     0.1131      0.1325      0.0444      Uij ? ?
  H(2)   -0.1080     -0.0481     0.0700      0.0441      Uij ? ?
  H(3)   0.2362      -0.1475     0.1463      0.0390      Uij ? ?
  H(4)   0.3063      0.0140      0.2066      0.0412      Uij ? ?
  H(5)   -0.0203     -0.2942     0.1914      0.0443      Uij ? ?
  H(6)   -0.2081     -0.3830     0.2293      0.0431      Uij ? ?
  H(7)   -0.4024     -0.3392     0.0196      0.0422      Uij ? ?
  H(8)   -0.2108     -0.2540     -0.0195     0.0408      Uij ? ?
  H(9)   -0.5817     -0.3670     0.1037      0.0488      Uij ? ?
  H(10)  -0.5413     -0.4648     0.0607      0.0488      Uij ? ?
  H(11)  -0.7288     -0.5046     0.1221      0.0566      Uij ? ?
  H(12)  -0.6158     -0.5632     0.1570      0.0566      Uij ? ?
  H(13)  -0.7205     -0.5080     0.2586      0.0651      Uij ? ?
  H(14)  -0.5856     -0.4432     0.2645      0.0651      Uij ? ?
  H(15)  -0.6817     -0.3106     0.2121      0.0837      Uij ? ?
  H(16)  -0.8166     -0.3754     0.2053      0.0837      Uij ? ?
  H(17)  -0.6787     -0.3090     0.3496      0.0978      Uij ? ?
  H(18)  -0.7918     -0.2527     0.3120      0.0978      Uij ? ?
  H(19)  -0.9403     -0.3812     0.3343      0.1107      Uij ? ?
  H(20)  -0.8536     -0.3540     0.4129      0.1107      Uij ? ?
  H(21)  -0.8318     -0.4498     0.3600      0.1107      Uij ? ?
  H(22)  0.0757      0.1739      0.3389      0.0503      Uij ? ?
  H(23)  -0.0633     0.2843      0.3914      0.0555      Uij ? ?
  H(24)  -0.0508     0.4464      0.1978      0.0547      Uij ? ?
  H(25)  0.0891      0.3366      0.1466      0.0493      Uij ? ?
  H(26)  -0.2125     0.3789      0.4158      0.1060      Uij ? ?
  H(27)  -0.1031     0.4676      0.4393      0.1060      Uij ? ?
  H(28b) -0.2720     0.5767      0.3817      0.1179      Uij ? ?
  H(28a) -0.2026     0.5427      0.4431      0.0641      Uij ? ?
  H(29b) -0.3447     0.5658      0.3927      0.0641      Uij ? ?
  H(29a) -0.3698     0.4863      0.4013      0.1179      Uij ? ?
  H(30)  -0.2925     0.5125      0.5250      0.2131      Uij ? ?
  H(31)  -0.2086     0.6091      0.5022      0.2131      Uij ? ?
  H(32)  -0.4839     0.6244      0.4599      0.1511      Uij ? ?
  H(33)  -0.4508     0.6302      0.5506      0.1511      Uij ? ?
  H(34)  -0.2829     0.7323      0.5396      0.1752      Uij ? ?
  H(35)  -0.3142     0.7256      0.4488      0.1752      Uij ? ?
  H(36)  -0.4698     0.8591      0.5026      0.1218      Uij ? ?
  H(37)  -0.5614     0.7624      0.4705      0.1218      Uij ? ?
  H(38)  -0.5208     0.7804      0.5602      0.1218      Uij ? ?
  H(39)  0.3379      0.2999      0.3147      0.0453      Uij ? ?
  H(40)  0.5575      0.3575      0.3130      0.0474      Uij ? ?
  H(41)  0.6775      0.3071      0.2107      0.0415      Uij ? ?
  H(42)  0.3467      0.1520      0.1008      0.0364      Uij ? ?
  H(43)  0.6453      0.3945      0.0896      0.0401      Uij ? ?
  H(44)  0.8220      0.4882      0.0420      0.0416      Uij ? ?
  H(45)  0.9739      0.4085      -0.0255     0.0417      Uij ? ?
  H(46)  0.7845      0.1324      0.0115      0.0371      Uij ? ?
  H(47)  0.5576      0.0106      0.1354      0.0374      Uij ? ?
  H(48)  0.4827      -0.1487     0.0709      0.0390      Uij ? ?
  H(49)  0.9610      0.0674      0.7055      0.0801      Uij ? ?
  H(50)  0.7647      -0.0104     0.6431      0.0850      Uij ? ?
  H(51)  0.7098      0.0112      0.5108      0.0999      Uij ? ?
  H(52)  0.8542      0.1094      0.4397      0.1005      Uij ? ?
  H(53)  1.0492      0.1868      0.5023      0.0942      Uij ? ?
  H(54)  1.1029      0.1665      0.6354      0.0844      Uij ? ?
  H(55)  0.2232      0.1272      0.7866      0.0725      Uij ? ?
  H(56)  0.1732      -0.0439     0.7458      0.0710      Uij ? ?
  H(57)  0.3210      -0.1311     0.6799      0.0690      Uij ? ?
  H(58)  0.5176      -0.0436     0.6511      0.0741      Uij ? ?
  H(59)  0.5657      0.1290      0.6913      0.0765      Uij ? ?
  H(60)  0.4173      0.2152      0.7575      0.0693      Uij ? ?

loop_
_atom_site_aniso_label
_atom_site_aniso_U_11
_atom_site_aniso_U_22
_atom_site_aniso_U_33
_atom_site_aniso_U_12
_atom_site_aniso_U_13
_atom_site_aniso_U_23
  O(1)   0.030(1)    0.043(1)    0.048(1)    -0.002(1)   0.007(1)    0.008(1)
  O(2)   0.051(2)    0.052(2)    0.074(2)    0.021(1)    0.011(1)    -0.022(1)
  N(1)   0.034(2)    0.025(2)    0.052(2)    -0.003(1)   0.016(1)    -0.006(1)
  N(2)   0.032(2)    0.033(2)    0.060(2)    -0.005(1)   0.016(1)    -0.016(1)
  N(3)   0.034(1)    0.027(2)    0.036(2)    -0.004(1)   0.011(1)    -0.006(1)
  C(1)   0.033(2)    0.027(2)    0.037(2)    -0.001(1)   0.012(2)    -0.004(1)
  C(2)   0.035(2)    0.027(2)    0.049(2)    0.004(1)    0.010(2)    -0.002(2)
  C(3)   0.030(2)    0.032(2)    0.047(2)    0.000(2)    0.005(2)    -0.004(2)
  C(4)   0.033(2)    0.027(2)    0.039(2)    -0.002(1)   0.013(2)    0.000(1)
  C(5)   0.036(2)    0.026(2)    0.037(2)    0.006(1)    0.012(2)    0.002(1)
  C(6)   0.032(2)    0.036(2)    0.035(2)    0.001(2)    0.006(1)    0.001(2)
  C(7)   0.030(2)    0.023(2)    0.043(2)    0.002(1)    0.010(2)    -0.004(1)
  C(8)   0.029(2)    0.038(2)    0.044(2)    0.005(1)    0.003(2)    -0.002(2)
  C(9)   0.038(2)    0.034(2)    0.037(2)    0.004(2)    0.007(2)    0.005(2)
  C(10)  0.030(2)    0.024(2)    0.044(2)    0.001(1)    0.009(2)    0.001(2)
  C(11)  0.033(2)    0.030(2)    0.042(2)    0.001(1)    0.004(2)    -0.001(2)
  C(12)  0.038(2)    0.028(2)    0.036(2)    0.001(1)    0.006(2)    0.001(1)
  C(13)  0.033(2)    0.040(2)    0.048(2)    -0.002(2)   0.005(2)    0.001(2)
  C(14)  0.034(2)    0.051(2)    0.057(2)    -0.001(2)   0.010(2)    0.006(2)
  C(15)  0.042(2)    0.057(3)    0.064(3)    0.002(2)    0.009(2)    0.004(2)
  C(16)  0.077(3)    0.053(3)    0.081(3)    0.014(2)    0.017(2)    -0.006(2)
  C(17)  0.071(3)    0.066(3)    0.108(4)    0.006(2)    0.022(3)    -0.017(3)
  C(18)  0.116(4)    0.072(3)    0.091(4)    0.005(3)    0.030(3)    -0.005(3)
  C(19)  0.031(2)    0.029(2)    0.041(2)    -0.002(1)   0.010(2)    -0.011(2)
  C(20)  0.045(2)    0.037(2)    0.048(2)    0.012(2)    0.014(2)    0.005(2)
  C(21)  0.048(2)    0.050(2)    0.043(2)    0.011(2)    0.017(2)    -0.002(2)
  C(22)  0.032(2)    0.036(2)    0.052(2)    0.005(2)    0.002(2)    -0.014(2)
  C(23)  0.050(2)    0.036(2)    0.050(2)    0.008(2)    -0.001(2)   0.001(2)
  C(24)  0.047(2)    0.038(2)    0.038(2)    0.002(2)    0.008(2)    -0.002(2)
  C(25)  0.077(3)    0.104(4)    0.087(4)    0.044(3)    0.020(3)    -0.042(3)
  C(31)  0.031(2)    0.027(2)    0.040(2)    -0.001(1)   0.008(2)    -0.003(2)
  C(32)  0.042(2)    0.035(2)    0.037(2)    0.000(2)    0.014(2)    -0.007(2)
  C(33)  0.044(2)    0.035(2)    0.037(2)    -0.001(2)   0.003(2)    -0.010(2)
  C(34)  0.032(2)    0.034(2)    0.036(2)    -0.001(1)   0.002(2)    -0.002(2)
  C(35)  0.033(2)    0.024(2)    0.034(2)    0.003(1)    0.008(1)    -0.002(1)
  C(36)  0.033(2)    0.025(2)    0.032(2)    0.001(1)    0.002(1)    -0.004(1)
  C(37)  0.029(2)    0.028(2)    0.030(2)    -0.001(1)   0.004(1)    -0.003(1)
  C(38)  0.035(2)    0.025(2)    0.040(2)    0.003(1)    0.006(2)    -0.002(1)
  C(39)  0.039(2)    0.021(2)    0.044(2)    0.001(1)    0.010(2)    -0.002(1)
  C(40)  0.033(2)    0.028(2)    0.042(2)    -0.003(1)   0.009(2)    0.000(2)
  C(41)  0.033(2)    0.024(2)    0.035(2)    0.000(1)    0.006(1)    -0.002(1)
  C(42)  0.035(2)    0.022(2)    0.036(2)    0.002(1)    0.005(2)    -0.001(1)
  C(43)  0.025(2)    0.026(2)    0.034(2)    -0.002(1)   0.006(1)    -0.004(1)
  C(44)  0.033(2)    0.030(2)    0.030(2)    0.002(1)    0.002(1)    -0.003(1)
  C(45)  0.036(2)    0.025(2)    0.037(2)    0.001(1)    0.009(1)    0.002(1)
  C(46)  0.066(3)    0.087(3)    0.054(3)    0.024(2)    0.014(2)    0.016(2)
  C(47)  0.058(3)    0.078(3)    0.081(3)    0.016(2)    0.014(3)    0.020(3)
  C(48)  0.075(3)    0.079(4)    0.091(4)    0.006(3)    -0.017(3)   0.012(3)
  C(49)  0.104(4)    0.083(4)    0.061(3)    0.004(3)    -0.010(3)   0.021(3)
  C(50)  0.081(3)    0.091(4)    0.064(3)    0.002(3)    0.004(3)    0.026(3)
  C(51)  0.066(3)    0.085(3)    0.061(3)    0.006(2)    0.000(2)    0.021(2)
  C(52)  0.058(3)    0.069(3)    0.058(3)    0.025(2)    0.004(2)    0.003(2)
  C(53)  0.047(2)    0.071(3)    0.061(3)    0.006(2)    0.002(2)    0.009(2)
  C(54)  0.062(3)    0.047(2)    0.059(3)    0.009(2)    -0.014(2)   -0.004(2)
  C(55)  0.051(3)    0.073(3)    0.061(3)    0.017(2)    0.005(2)    -0.014(2)
  C(56)  0.059(3)    0.068(3)    0.063(3)    -0.004(2)   0.012(2)    0.000(2)
  C(57)  0.071(3)    0.046(2)    0.057(3)    0.014(2)    0.001(2)    0.002(2)
#------------------------------------------------------------------------------
_refine_special_details                ?
_refine_ls_structure_factor_coef       F
_refine_ls_matrix_type                 full
_refine_ls_weighting_scheme            sigma
_refine_ls_hydrogen_treatment          noref
_refine_ls_extinction_method           none
_refine_ls_extinction_coef             ?
_refine_ls_abs_structure_details       ?
_refine_ls_abs_structure_Flack         ?
_refine_ls_number_reflns               4712
_refine_ls_number_parameters           550
_refine_ls_number_restraints           0
_refine_ls_number_constraints          ?
_refine_ls_R_factor_all                ?
_refine_ls_R_factor_obs                0.0606
_refine_ls_wR_factor_all               ?
_refine_ls_wR_factor_obs               0.0775
_refine_ls_goodness_of_fit_all         ?
_refine_ls_goodness_of_fit_obs         3.501
_refine_ls_shift/esd_max               3.5215
_refine_ls_shift/esd_mean              ?
_refine_diff_density_min               -0.58
_refine_diff_density_max               0.59
#------------------------------------------------------------------------------
_geom_special_details                  ?
loop_
_geom_bond_atom_site_label_1
_geom_bond_atom_site_label_2
_geom_bond_distance
_geom_bond_site_symmetry_1
_geom_bond_site_symmetry_2
_geom_bond_publ_flag
     O(1)      C(10)     1.374(3)   ? ? yes
     O(1)      C(13)     1.435(4)   ? ? yes
     O(2)      C(22)     1.367(4)   ? ? yes
     O(2)      C(25)     1.406(5)   ? ? yes
     N(1)      C(4)      1.434(4)   ? ? yes
     N(1)      C(7)      1.441(4)   ? ? yes
     N(1)      C(41)     1.401(4)   ? ? yes
     N(2)      C(1)      1.421(4)   ? ? yes
     N(2)      C(19)     1.431(4)   ? ? yes
     N(2)      C(31)     1.420(4)   ? ? yes
     N(3)      C(35)     1.419(4)   ? ? yes
     N(3)      C(37)     1.421(4)   ? ? yes
     N(3)      C(43)     1.436(4)   ? ? yes
     C(1)      C(2)      1.386(4)   ? ? yes
     C(1)      C(6)      1.396(4)   ? ? yes
     C(2)      C(3)      1.390(4)   ? ? yes
     C(3)      C(4)      1.381(4)   ? ? yes
     C(4)      C(5)      1.390(4)   ? ? yes
     C(5)      C(6)      1.384(4)   ? ? yes
     C(7)      C(8)      1.385(4)   ? ? yes
     C(7)      C(12)     1.381(4)   ? ? yes
     C(8)      C(9)      1.379(4)   ? ? yes
     C(9)      C(10)     1.379(4)   ? ? yes
     C(10)     C(11)     1.390(4)   ? ? yes
     C(11)     C(12)     1.393(4)   ? ? yes
     C(13)     C(14)     1.502(4)   ? ? yes
     C(14)     C(15)     1.508(5)   ? ? yes
     C(15)     C(16)     1.485(5)   ? ? yes
     C(16)     C(17)     1.538(6)   ? ? yes
     C(17)     C(18)     1.487(6)   ? ? yes
     C(19)     C(20)     1.370(4)   ? ? yes
     C(19)     C(24)     1.379(4)   ? ? yes
     C(20)     C(21)     1.384(4)   ? ? yes
     C(21)     C(22)     1.383(5)   ? ? yes
     C(22)     C(23)     1.377(5)   ? ? yes
     C(23)     C(24)     1.379(5)   ? ? yes
     C(25)     C(26a)    1.59(1)    ? ? yes
     C(25)     C(26b)    1.68(2)    ? ? yes
     C(26a)    C(26b)    0.65(2)    ? ? yes
     C(26a)    C(27a)    1.32(2)    ? ? yes
     C(26a)    C(27b)    1.42(3)    ? ? yes
     C(26b)    C(27a)    1.46(2)    ? ? yes
     C(26b)    C(27b)    0.87(2)    ? ? yes
     C(27a)    C(27b)    1.45(2)    ? ? yes
     C(27a)    C(28a)    1.72(2)    ? ? yes
     C(28b)    C(28a)    1.60(2)    ? ? yes
     C(28b)    C(29a)    1.33(2)    ? ? yes
     C(28b)    C(29b)    1.30(2)    ? ? yes
     C(28a)    C(29a)    1.23(2)    ? ? yes
     C(28a)    C(29b)    0.90(2)    ? ? yes
     C(29a)    C(29b)    0.72(2)    ? ? yes
     C(29a)    C(30)     1.85(2)    ? ? yes
     C(29b)    C(30)     1.46(2)    ? ? yes
     C(31)     C(32)     1.392(4)   ? ? yes
     C(31)     C(36)     1.387(4)   ? ? yes
     C(32)     C(33)     1.380(4)   ? ? yes
     C(33)     C(34)     1.384(4)   ? ? yes
     C(34)     C(35)     1.393(4)   ? ? yes
     C(35)     C(36)     1.392(4)   ? ? yes
     C(37)     C(38)     1.395(4)   ? ? yes
     C(37)     C(42)     1.387(4)   ? ? yes
     C(38)     C(39)     1.385(4)   ? ? yes
     C(39)     C(40)     1.379(4)   ? ? yes
     C(40)     C(41)     1.395(4)   ? ? yes
     C(41)     C(42)     1.401(4)   ? ? yes
     C(43)     C(44)     1.383(4)   ? ? yes
     C(43)     C(45)     1.392(4)   ? ? yes
     C(44)     C(45)     1.385(4)   ? ? yes
     C(46)     C(47)     1.372(6)   ? ? yes
     C(46)     C(51)     1.366(5)   ? ? yes
     C(47)     C(48)     1.371(6)   ? ? yes
     C(48)     C(49)     1.380(6)   ? ? yes
     C(49)     C(50)     1.362(6)   ? ? yes
     C(50)     C(51)     1.378(6)   ? ? yes
     C(52)     C(53)     1.366(5)   ? ? yes
     C(52)     C(57)     1.368(5)   ? ? yes
     C(53)     C(54)     1.370(5)   ? ? yes
     C(54)     C(55)     1.380(5)   ? ? yes
     C(55)     C(56)     1.374(6)   ? ? yes
     C(56)     C(57)     1.370(5)   ? ? yes
#------------------------------------------------------------------------------
loop_
_geom_angle_atom_site_label_1
_geom_angle_atom_site_label_2
_geom_angle_atom_site_label_3
_geom_angle
_geom_angle_site_symmetry_1
_geom_angle_site_symmetry_2
_geom_angle_site_symmetry_3
_geom_angle_publ_flag
    C(10)     O(1)      C(13)     118.3(2)   ? ? ? yes
    C(22)     O(2)      C(25)     118.3(3)   ? ? ? yes
    C(4)      N(1)      C(7)      116.2(2)   ? ? ? yes
    C(4)      N(1)      C(41)     120.4(2)   ? ? ? yes
    C(7)      N(1)      C(41)     120.6(2)   ? ? ? yes
    C(1)      N(2)      C(19)     120.1(2)   ? ? ? yes
    C(1)      N(2)      C(31)     119.8(2)   ? ? ? yes
    C(19)     N(2)      C(31)     119.9(2)   ? ? ? yes
    C(35)     N(3)      C(37)     122.6(2)   ? ? ? yes
    C(35)     N(3)      C(43)     118.3(2)   ? ? ? yes
    C(37)     N(3)      C(43)     119.1(2)   ? ? ? yes
    N(2)      C(1)      C(2)      121.7(3)   ? ? ? yes
    N(2)      C(1)      C(6)      119.5(3)   ? ? ? yes
    C(2)      C(1)      C(6)      118.8(3)   ? ? ? yes
    C(1)      C(2)      C(3)      120.5(3)   ? ? ? yes
    C(2)      C(3)      C(4)      120.7(3)   ? ? ? yes
    N(1)      C(4)      C(3)      120.6(3)   ? ? ? yes
    N(1)      C(4)      C(5)      120.6(3)   ? ? ? yes
    C(3)      C(4)      C(5)      118.8(3)   ? ? ? yes
    C(4)      C(5)      C(6)      120.7(3)   ? ? ? yes
    C(1)      C(6)      C(5)      120.3(3)   ? ? ? yes
    N(1)      C(7)      C(8)      120.3(3)   ? ? ? yes
    N(1)      C(7)      C(12)     120.4(3)   ? ? ? yes
    C(8)      C(7)      C(12)     119.2(3)   ? ? ? yes
    C(7)      C(8)      C(9)      120.4(3)   ? ? ? yes
    C(8)      C(9)      C(10)     120.4(3)   ? ? ? yes
    O(1)      C(10)     C(9)      115.3(3)   ? ? ? yes
    O(1)      C(10)     C(11)     124.6(3)   ? ? ? yes
    C(9)      C(10)     C(11)     120.1(3)   ? ? ? yes
    C(10)     C(11)     C(12)     119.0(3)   ? ? ? yes
    C(7)      C(12)     C(11)     120.9(3)   ? ? ? yes
    O(1)      C(13)     C(14)     107.8(3)   ? ? ? yes
    C(13)     C(14)     C(15)     115.5(3)   ? ? ? yes
    C(14)     C(15)     C(16)     113.5(3)   ? ? ? yes
    C(15)     C(16)     C(17)     115.3(4)   ? ? ? yes
    C(16)     C(17)     C(18)     115.7(4)   ? ? ? yes
    N(2)      C(19)     C(20)     120.6(3)   ? ? ? yes
    N(2)      C(19)     C(24)     120.3(3)   ? ? ? yes
    C(20)     C(19)     C(24)     119.1(3)   ? ? ? yes
    C(19)     C(20)     C(21)     120.9(3)   ? ? ? yes
    C(20)     C(21)     C(22)     119.9(3)   ? ? ? yes
    O(2)      C(22)     C(21)     124.5(3)   ? ? ? yes
    O(2)      C(22)     C(23)     116.2(3)   ? ? ? yes
    C(21)     C(22)     C(23)     119.3(3)   ? ? ? yes
    C(22)     C(23)     C(24)     120.3(3)   ? ? ? yes
    C(19)     C(24)     C(23)     120.6(3)   ? ? ? yes
    O(2)      C(25)     C(26a)    109.6(6)   ? ? ? yes
    O(2)      C(25)     C(26b)    97.9(7)    ? ? ? yes
    C(26a)    C(25)     C(26b)    22.8(7)    ? ? ? yes
    C(25)     C(26a)    C(26b)    86(2)      ? ? ? yes
    C(25)     C(26a)    C(27a)    116(1)     ? ? ? yes
    C(25)     C(26a)    C(27b)    97(1)      ? ? ? yes
    C(26b)    C(26a)    C(27a)    88(2)      ? ? ? yes
    C(26b)    C(26a)    C(27b)    24(2)      ? ? ? yes
    C(27a)    C(26a)    C(27b)    63(1)      ? ? ? yes
    C(25)     C(26b)    C(26a)    70(2)      ? ? ? yes
    C(25)     C(26b)    C(27a)    104(1)     ? ? ? yes
    C(25)     C(26b)    C(27b)    121(2)     ? ? ? yes
    C(26a)    C(26b)    C(27a)    64(2)      ? ? ? yes
    C(26a)    C(26b)    C(27b)    136(3)     ? ? ? yes
    C(27a)    C(26b)    C(27b)    72(2)      ? ? ? yes
    C(26a)    C(27a)    C(26b)    26.4(9)    ? ? ? yes
    C(26a)    C(27a)    C(27b)    61(1)      ? ? ? yes
    C(26a)    C(27a)    C(28a)    113(1)     ? ? ? yes
    C(26b)    C(27a)    C(27b)    34(1)      ? ? ? yes
    C(26b)    C(27a)    C(28a)    115(1)     ? ? ? yes
    C(27b)    C(27a)    C(28a)    109(1)     ? ? ? yes
    C(26a)    C(27b)    C(26b)    18(1)      ? ? ? yes
    C(26a)    C(27b)    C(27a)    54(1)      ? ? ? yes
    C(26b)    C(27b)    C(27a)    72(2)      ? ? ? yes
    C(28a)    C(28b)    C(29a)    48(1)      ? ? ? yes
    C(28a)    C(28b)    C(29b)    34.0(9)    ? ? ? yes
    C(29a)    C(28b)    C(29b)    31.5(10)   ? ? ? yes
    C(27a)    C(28a)    C(28b)    82(1)      ? ? ? yes
    C(27a)    C(28a)    C(29a)    92(1)      ? ? ? yes
    C(27a)    C(28a)    C(29b)    123(1)     ? ? ? yes
    C(28b)    C(28a)    C(29a)    54(1)      ? ? ? yes
    C(28b)    C(28a)    C(29b)    53(1)      ? ? ? yes
    C(29a)    C(28a)    C(29b)    35(1)      ? ? ? yes
    C(28b)    C(29a)    C(28a)    77(1)      ? ? ? yes
    C(28b)    C(29a)    C(29b)    71(2)      ? ? ? yes
    C(28b)    C(29a)    C(30)     99(1)      ? ? ? yes
    C(28a)    C(29a)    C(29b)    46(1)      ? ? ? yes
    C(28a)    C(29a)    C(30)     89(1)      ? ? ? yes
    C(29b)    C(29a)    C(30)     47(2)      ? ? ? yes
    C(28b)    C(29b)    C(28a)    91(1)      ? ? ? yes
    C(28b)    C(29b)    C(29a)    76(2)      ? ? ? yes
    C(28b)    C(29b)    C(30)     124(1)     ? ? ? yes
    C(28a)    C(29b)    C(29a)    98(2)      ? ? ? yes
    C(28a)    C(29b)    C(30)     136(2)     ? ? ? yes
    C(29a)    C(29b)    C(30)     111(2)     ? ? ? yes
    C(29a)    C(30)     C(29b)    21.2(9)    ? ? ? yes
    N(2)      C(31)     C(32)     120.4(3)   ? ? ? yes
    N(2)      C(31)     C(36)     120.1(3)   ? ? ? yes
    C(32)     C(31)     C(36)     119.6(3)   ? ? ? yes
    C(31)     C(32)     C(33)     118.9(3)   ? ? ? yes
    C(32)     C(33)     C(34)     122.3(3)   ? ? ? yes
    C(33)     C(34)     C(35)     118.8(3)   ? ? ? yes
    N(3)      C(35)     C(34)     122.0(2)   ? ? ? yes
    N(3)      C(35)     C(36)     118.6(3)   ? ? ? yes
    C(34)     C(35)     C(36)     119.4(3)   ? ? ? yes
    C(31)     C(36)     C(35)     121.0(3)   ? ? ? yes
    N(3)      C(37)     C(38)     121.7(3)   ? ? ? yes
    N(3)      C(37)     C(42)     118.8(3)   ? ? ? yes
    C(38)     C(37)     C(42)     119.5(3)   ? ? ? yes
    C(37)     C(38)     C(39)     118.7(3)   ? ? ? yes
    C(38)     C(39)     C(40)     122.2(3)   ? ? ? yes
    C(39)     C(40)     C(41)     119.6(3)   ? ? ? yes
    N(1)      C(41)     C(40)     121.7(3)   ? ? ? yes
    N(1)      C(41)     C(42)     119.9(3)   ? ? ? yes
    C(40)     C(41)     C(42)     118.3(3)   ? ? ? yes
    C(37)     C(42)     C(41)     121.5(3)   ? ? ? yes
    N(3)      C(43)     C(44)     120.2(3)   ? ? ? yes
    N(3)      C(43)     C(45)     121.0(3)   ? ? ? yes
    C(44)     C(43)     C(45)     118.7(3)   ? ? ? yes
    C(43)     C(44)     C(45)     120.9(3)   ? ? ? yes
    C(43)     C(45)     C(44)     120.4(3)   ? ? ? yes
    C(47)     C(46)     C(51)     119.9(4)   ? ? ? yes
    C(46)     C(47)     C(48)     120.2(4)   ? ? ? yes
    C(47)     C(48)     C(49)     119.9(4)   ? ? ? yes
    C(48)     C(49)     C(50)     119.6(4)   ? ? ? yes
    C(49)     C(50)     C(51)     120.5(4)   ? ? ? yes
    C(46)     C(51)     C(50)     119.8(4)   ? ? ? yes
    C(53)     C(52)     C(57)     120.5(4)   ? ? ? yes
    C(52)     C(53)     C(54)     120.1(4)   ? ? ? yes
    C(53)     C(54)     C(55)     119.7(4)   ? ? ? yes
    C(54)     C(55)     C(56)     119.7(4)   ? ? ? yes
    C(55)     C(56)     C(57)     120.3(4)   ? ? ? yes
    C(52)     C(57)     C(56)     119.7(4)   ? ? ? yes
#------------------------------------------------------------------------------
_publ_requested_journal               ' ENTER JOURNAL NAME HERE'

_publ_contact_author
;
     ENTER NAME
  ENTER ADDRESS
;
_publ_contact_letter
;
     ENTER TEXT OF LETTER
;

_publ_requested_coeditor_name          ?
_publ_contact_author_phone            ' ENTER PHONE NUMBER '
_publ_contact_author_fax              ' ENTER FAX NUMBER '
_publ_contact_author_email            ' ENTER EMAIL ADDRESS '
loop_
_publ_author_name
_publ_author_address
' FIRST AUTHORS NAME '
;
   FIRST AUTHORS ADDRESS
;

_publ_section_title
;
     ENTER SECTION TITLE
;

_publ_section_abstract
;
     ENTER ABSTRACT
;

_publ_section_experimental
;
     ENTER EXPERIMENTAL SECTION
;

_publ_section_comment
;
     ENTER TEXT
;

_publ_section_references
;
     ENTER OTHER REFERENCES
Molecular Structure Corporation (1985, 1992). teXsan.
Crystal Structure Analysis Package, The Woodlands, TX, USA 77381
;

_publ_section_acknowledgements
;
     ENTER ACKNOWLEDGEMENTS
;

_publ_section_table_legends
;
     ENTER TABLE LEGENDS
;

_publ_section_figure_captions
;
     ENTER FIGURE CAPTIONS
;
